# Supplementary material
Source: Research Square preprint supplement (doi:10.21203/rs.3.rs-8802844/v1)
Supplement: Supplementary file 1 [file 28ebe9018ea628f2892916d2.docx]

**Supplementary Table S4. Pearson correlation coefficients (r) and significance level for symbiotic parameters for the soybean cultivar Suong Pungun**. Significance levels are indicated as follows: ****p* < 0.001, ***p* < 0.01, **p* < 0.05, and ns = non-significant. ARA: Acetylene Reduction Activity; RSE, Relative Symbiotic Effectiveness

| **Trait1** | **Trait2** | **rho** | ***p*-value** | **sig** |
| --- | --- | --- | --- | --- |
| Nodule weight | Nodule number | 0.64287437 | 0.00012754 | *** |
| ARA | Nodule number | 0.69389121 | 2.12E-05 | *** |
| Shoot dry weight | Nodule number | 0.66803919 | 5.49E-05 | *** |
| RSE | Nodule number | 0.73768374 | 3.30E-06 | *** |
| Nodule number | Nodule weight | 0.64287437 | 0.00012754 | *** |
| ARA | Nodule weight | 0.73899188 | 3.10E-06 | *** |
| Shoot dry weight | Nodule weight | 0.8838113 | 9.70E-11 | *** |
| RSE | Nodule weight | 0.90043882 | 1.24E-11 | *** |
| Nodule_number | ARA | 0.69389121 | 2.12E-05 | *** |
| Nodule weight | ARA | 0.73899188 | 3.10E-06 | *** |
| Shoot dry weight | ARA | 0.73334075 | 4.03E-06 | *** |
| RSE | ARA | 0.77430941 | 5.15E-07 | *** |
| Nodule number | Shoot dry weight | 0.66803919 | 5.49E-05 | *** |
| Nodule weight | Shoot dry weight | 0.8838113 | 9.70E-11 | *** |
| ARA | Shoot dry weight | 0.73334075 | 4.03E-06 | *** |
| RSE | shoot dry weight | 0.87697782 | 2.07E-10 | *** |
| Nodule number | RSE | 0.73768374 | 3.30E-06 | *** |
| Nodule weight | RSE | 0.90043882 | 1.24E-11 | *** |
| ARA | RSE | 0.77430941 | 5.15E-07 | *** |
| Shoot dry weight | RSE | 0.87697782 | 2.07E-10 | *** |
