# Supplementary material
Source: Research Square preprint supplement (doi:10.21203/rs.3.rs-8802844/v1)
Supplement: Supplementary file 2 [file 843c7f051edf60c055911314.docx]

**Supplementary Table S1. Pearson correlation coefficients (r) and significance level for symbiotic parameters across three soybean cultivars**. Significance levels are indicated as follows: ****p* < 0.001, ***p* < 0.01, **p* < 0.05, and ns = non-significant. ARA: Acetylene Reduction Activity; RSE, Relative Symbiotic Effectiveness

| **Trait1** | **Trait2** | **rho** | ***p*-value** | **sig** |
| --- | --- | --- | --- | --- |
| Nodule weight | Nodule number | 0.64651544 | 5.87E-12 | *** |
| ARA | Nodule number | 0.61949822 | 7.54E-11 | *** |
| Shoot dry weight | Nodule number | 0.59847395 | 4.67E-10 | *** |
| RSE | Nodule number | 0.61481994 | 1.14E-10 | *** |
| Nodule number | Nodule weight | 0.64651544 | 5.87E-12 | *** |
| ARA | Nodule weight | 0.765394 | 0 | *** |
| Shoot dry weight | Nodule weight | 0.88521497 | 0 | *** |
| RSE | Nodule weight | 0.87872186 | 0 | *** |
| Nodule number | ARA | 0.61949822 | 7.54E-11 | *** |
| Nodule weight | ARA | 0.765394 | 0 | *** |
| Shoot dry weight | ARA | 0.75036841 | 0 | *** |
| RSE | ARA | 0.72546025 | 6.66E-16 | *** |
| Nodule number | Shoot dry weight | 0.59847395 | 4.67E-10 | *** |
| Nodule weight | Shoot dry weight | 0.88521497 | 0 | *** |
| ARA | Shoot dry weight | 0.75036841 | 0 | *** |
| RSE | Shoot dry weight | 0.93933011 | 0 | *** |
| Nodule number | RSE | 0.61481994 | 1.14E-10 | *** |
| Nodule weight | RSE | 0.87872186 | 0 | *** |
| ARA | RSE | 0.72546025 | 6.66E-16 | *** |
| Shoot dry weight | RSE | 0.93933011 | 0 | *** |
