# Supplementary material
Source: Research Square preprint supplement (doi:10.21203/rs.3.rs-8802844/v1)
Supplement: Supplementary file 3 [file 8a9bf44a6f057b73fd72fc1f.docx]

**Supplementary Table S2. Pearson correlation coefficients (r) and significance level for symbiotic parameters for the soybean cultivar Favour**. Significance levels are indicated as follows: ****p* < 0.001, ***p* < 0.01, **p* < 0.05, and ns = non-significant. ARA: Acetylene Reduction Activity; RSE, Relative Symbiotic Effectiveness

| **Trait1** | **Trait2** | **rho** | ***p*-value** | **sig** |
| --- | --- | --- | --- | --- |
| Nodule weight | Nodule number | 0.66179354 | 6.81E-05 | *** |
| ARA | Nodule number | 0.58917859 | 0.00061338 | *** |
| Shoot dry weight | Nodule number | 0.6014478 | 0.00043907 | *** |
| RSE | Nodule number | 0.56766188 | 0.00106875 | ** |
| Nodule number | Nodule weight | 0.66179354 | 6.81E-05 | *** |
| ARA | Nodule weight | 0.63856572 | 0.00014626 | *** |
| Shoot dry weight | Nodule weight | 0.83837374 | 7.35E-09 | *** |
| RSE | Nodule weight | 0.71110244 | 1.06E-05 | *** |
| Nodule number | ARA | 0.58917859 | 0.00061338 | *** |
| Nodule weight | ARA | 0.63856572 | 0.00014626 | *** |
| Shoot dry weight | ARA | 0.67779263 | 3.87E-05 | *** |
| RSE | ARA | 0.57721247 | 0.00083923 | *** |
| Nodule number | Shoot dry weight | 0.6014478 | 0.00043907 | *** |
| Nodule weight | Shoot dry weight | 0.83837374 | 7.35E-09 | *** |
| ARA | Shoot dry weight | 0.67779263 | 3.87E-05 | *** |
| RSE | Shoot dry weight | 0.89518018 | 2.47E-11 | *** |
| Nodule number | RSE | 0.56766188 | 0.00106875 | ** |
| Nodule weight | RSE | 0.71110244 | 1.06E-05 | *** |
| ARA act | RSE | 0.57721247 | 0.00083923 | *** |
| Shoot dry weight | RSE | 0.89518018 | 2.47E-11 | *** |
