# Supplementary material
Source: Research Square preprint supplement (doi:10.21203/rs.3.rs-8802844/v1)
Supplement: Supplementary file 4 [file 974f0e65b403297d348752f5.docx]

**Supplementary Table S3. Pearson correlation coefficients (r) and significance level for symbiotic parameters for the soybean cultivar Jenguma**. Significance levels are indicated as follows: ****p* < 0.001, ***p* < 0.01, **p* < 0.05, and ns = non-significant. ARA: Acetylene Reduction Activity; RSE, Relative Symbiotic Effectiveness

| **Trait1** | **Trait2** | **rho** | ***p*-value** | **sig** |
| --- | --- | --- | --- | --- |
| Nodule weight | Nodule number | 0.62826773 | 0.00020123 | *** |
| ARA | Nodule number | 0.3191183 | 0.08563591 | ns |
| Shoot dry weight | Nodule number | 0.51716835 | 0.00342765 | ** |
| RSE | Nodule number | 0.49524959 | 0.00539206 | ** |
| Nodule number | Nodule weight | 0.62826773 | 0.00020123 | *** |
| ARA | Nodule weight | 0.52886733 | 0.00265818 | ** |
| Shoot dry weight | Nodule weight | 0.71968432 | 7.38E-06 | *** |
| RSE | Nodule weight | 0.51168572 | 0.00384965 | ** |
| Nodule number | ARA | 0.3191183 | 0.08563591 | ns |
| Nodule weight | ARA | 0.52886733 | 0.00265818 | ** |
| Shoot dry weight | ARA | 0.39648097 | 0.03007316 | * |
| RSE | ARA | 0.14011313 | 0.46022493 | ns |
| Nodule number | Shoot dry weight | 0.51716835 | 0.00342765 | ** |
| Nodule weight | Shoot dry weight | 0.71968432 | 7.38E-06 | *** |
| ARA | Shoot dry weight | 0.39648097 | 0.03007316 | * |
| RSE | Shoot dry weight | 0.77458736 | 5.07E-07 | *** |
| Nodule number | RSE | 0.49524959 | 0.00539206 | ** |
| Nodule weight | RSE | 0.51168572 | 0.00384965 | ** |
| ARA | RSE | 0.14011313 | 0.46022493 | ns |
| Shoot dry weight | RSE | 0.77458736 | 5.07E-07 | *** |
